1 **Persistently high proportions of *Plasmodium*-infected *Anopheles***  
2 ***funestus* mosquitoes in two villages in the Kilombero valley, south-**  
3 **eastern Tanzania**

4

5 Salum A. Mapua<sup>1,3\*</sup>, Emmanuel E. Hape<sup>1,4</sup>, Japhet Kihonda<sup>1</sup>, Hamis Bwanary<sup>1</sup>,  
6 Khamis Kifungo<sup>1</sup>, Masoud Kilalangongono<sup>1</sup>, Emmanuel W. Kaindoa<sup>1,5</sup>, Halfan S.  
7 Ngowo<sup>1,4</sup> and Fredros O. Okumu<sup>1,2,4,5</sup>.

8

9 1. Environmental Health and Ecological Sciences Department, Ifakara Health  
10 Institute, P. O. Box 53, Morogoro, Tanzania.

11 2. School of Public Health, Faculty of Health Sciences, University of the  
12 Witwatersrand, Johannesburg, South Africa.

13 3. Centre for Applied Entomology and Parasitology, School of Life Sciences,  
14 Keele University, Huxley Building, Keele, Staffordshire ST5 5BG, UK.

15 4. Institute of Biodiversity, Animal Health and Comparative Medicine, University  
16 of Glasgow, Glasgow G12 8QQ, UK.

17 5. School of life science and bioengineering, The Nelson Mandela African  
18 Institution of Science and Technology, P. O. Box 447, Arusha, Tanzania.

19

20 \* Corresponding author at: Department of Environmental Health and Ecological  
21 Sciences, Ifakara Health Institute.

22 Email address: [smapua@ihi.or.tz](mailto:smapua@ihi.or.tz)

23

24

25

26 **Abstract**

27 **Background:** In south-eastern Tanzania where insecticide-treated nets have been  
28 widely used for more than 20 years, malaria transmission has greatly reduced but  
29 remains highly heterogenous over small distances. This study investigated the  
30 seasonal prevalence of *Plasmodium* sporozoite infections in the two main malaria  
31 vector species, *Anopheles funestus* and *Anopheles arabiensis* for 34 months,  
32 starting January 2018 to November 2020.

33

34 **Methods:** Adult mosquitoes were collected using CDC-light traps and Prokopack  
35 aspirators inside local houses in Igumbiro and Sululu villages, where earlier surveys  
36 had found very high densities of *An. funestus*. Collected females were sorted by  
37 taxa, and the samples examined using ELISA assays for detecting *Plasmodium*  
38 circumsporozoite protein in their salivary glands.

39

40 **Results:** Of 7,859 *An. funestus* tested, 4.6% (n = 365) were positive for *Pf*  
41 sporozoites in the salivary glands. On the contrary, only 0.4% (n = 9) of the 2,382  
42 *An. arabiensis* tested were positive. The sporozoite prevalence did not vary  
43 significantly between the villages or seasons. Similarly, the proportions of parous  
44 females of either species were not significantly different between the two villages (p  
45 > 0.05) but was slightly higher in *An. funestus* (0.50) than in *An. arabiensis* (0.42).  
46 Analysis of the 2020 data determined that *An. funestus* contributed 97.7% of all  
47 malaria transmitted in households in these two villages.

48

49 **Conclusions:** In contexts where individual vector species mediate most of the  
50 pathogen transmission, it may be most appropriate to pursue a species-specific

51 approach to better understand the ecology of the dominant vectors and target them  
52 with effective interventions to suppress transmission. Despite the widespread use  
53 and overall impact of insecticide-treated nets over the past two decades in the two  
54 study villages, there is still persistently high *Plasmodium* infection prevalence in local  
55 populations of *An. funestus*, which now carry ~97% of all malaria infections and  
56 mediates intense year-round transmission. Further reduction in malaria burden in  
57 these or other similar settings requires effective targeting of *An. funestus*.

58

59 **Keywords:** *Anopheles funestus*, Kilombero valley, malaria transmission,  
60 *Plasmodium*, sporozoite prevalence, Ifakara Health Institute, Tanzania

61

## 62 **1. Introduction**

63 Starting two decades ago when more than a million lives were being lost to malaria  
64 yearly [1], there have been significant gains, including ~60% reduction in deaths,  
65 despite doubling of Africa's population [2]. Insecticide-treated nets (ITNs), indoor  
66 residual spraying (IRS) and effective case management have contributed greatly to  
67 these gains [3,4]. The persisting malaria transmission in most endemic settings is  
68 now thought to be largely due to widespread insecticide resistance among major  
69 malaria vectors [5–8], behavioral adaptation of malaria vectors to indoor  
70 interventions [9–11], parasite resistance to anti-malarial drugs [12,13], certain human  
71 behaviors and activities [14–16] and asymptomatic infections in older age groups  
72 such as school-aged children [17]. Other factors such as inadequate environmental  
73 sanitation, poor housing conditions and low household incomes may also be  
74 perpetuating risk in many endemic villages [18,19], despite more than two decades  
75 of widespread ITN use.

76 In rural south-eastern Tanzanian villages, where ITNs have been widely used for  
77 more than 20 years, malaria transmission intensities have greatly reduced, in some  
78 cases from highs of >300 infectious bites per person per year (ib/p/y) in early 2000s  
79 to new averages below 30 ib/p/y [20]. These gains have been mostly attributed to  
80 widespread use of ITNs and effective case management [20,21]. Today, malaria  
81 transmission remains highly varied over small distances [20,22], and recent parasite  
82 surveys have demonstrated ranges of <1% prevalence in urban centers of Ifakara  
83 town (<150m above sea level) to highs of >40% in some higher altitude villages  
84 (~300m above sea level) just 30km away (Swai *et al.*, unpublished).

85

86 Recent studies in Ulanga and Kilombero districts, have demonstrated that *Anopheles*  
87 *funestus* alone now contributes nearly nine in every ten new infections, even in  
88 villages where it is outnumbered by *Anopheles arabiensis* [6,23]. The species is also  
89 strongly resistant to pyrethroids used in the ITNs [24], survives much longer than its  
90 counterparts [6,25] and is strongly adapted to primarily bite humans over other  
91 vertebrates [26]. Historically, *Anopheles gambiae* sensu stricto dominated  
92 transmission in Ulanga and Kilombero districts, with the *An. funestus* being another  
93 important vector during the dry season [27]. However, *An. gambiae* s.s population  
94 and contribution to the malaria transmission in these districts started to decline  
95 following introduction of the ITNs [22,23], and reached undetectable level by 2012  
96 [23]. Recent studies have confirmed absence of the *An. gambiae* s.s in these  
97 districts, leaving the sibling species *An. arabiensis* at large [6,18,28,29]. While no  
98 detailed analysis has been conducted, it is hypothesized that villages currently  
99 having the greatest malaria prevalence are those with highest densities of *An.*  
100 *funestus*. Moreover, given its preference for permanent and semi-permanent aquatic

101 habitats which last far longer than the rainy season [30], this species is thought to be  
102 important for year-long transmission of malaria.

103

104 This current analysis was conducted in two villages, previously identified as having  
105 high densities of *An. funestus* [31], and coincidentally having very high malaria  
106 prevalence estimates (Swai *et al.*, unpublished). The aim was to analyze and  
107 compare seasonal prevalence of *Plasmodium* sporozoite infections in the main  
108 malaria vectors, *An. funestus* and *An. arabiensis* following nearly two decades of  
109 widespread ITN use.

110

## 111 **2. Methods**

### 112 **2.1. Study area**

113 The study was done in Ulanga and Kilombero districts, in the Kilombero valley in  
114 south-eastern Tanzania (Figure 1). Mosquitoes were collected from two villages  
115 namely Sululu in Kilombero district (8.00324°S, 36.83118°E) and Igumbiro in Ulanga  
116 district (8.35021°S, 36.67299°E). Average annual rainfall was 1200 – 1600 mm and  
117 mean annual temperatures were 20 – 32°C [28]. Most residents here are subsistence  
118 farmers, cultivating mainly rice but also other crops such as maize, beans and sweet  
119 potatoes [32]. According to 2012 national population census, Igumbiro and Sululu  
120 villages are within wards with the population of 16,329 and 9,048 respectively [33].  
121 Sululu village sits on higher altitude above sea level compared to Igumbiro village  
122 (Figure 1).

123

124 **Figure 1:** Map showing villages in the Kilombero valley, south-eastern  
125 Tanzania where adult *Anopheles funestus* and *Anopheles arabiensis*  
126 mosquitoes were collected.

127

## 128 **2.2. Mosquito collection and processing**

129 Mosquitoes were routinely collected from January 2018 to December 2020. In each  
130 village, sampling was done in 10-20 houses for five nights each week from January  
131 2018 to January 2020, as part of the ongoing project that focused mainly on *An.*  
132 *funestus* mosquitoes. However, from March 2020 only three households were  
133 sampled nightly for four nights each week to December 2020, as part of another  
134 project focused on both *An. funestus* and *An. arabiensis* mosquitoes. Herein, data  
135 from both aforementioned projects were combined and analysed. All collections were  
136 done indoors, CDC light traps [34] and Prokopack aspirators [35] were used to  
137 sample host-seeking and resting mosquitoes respectively. Female mosquitoes were  
138 identified and sorted by taxa and physiological state [36], after which *An. arabiensis*  
139 and *An. funestus* were packed in batches of ten mosquitoes in 1.5 ml  
140 microcentrifuge tubes for circumsporozoite enzyme-linked immunosorbent assays  
141 (ELISA) [37], of which only a pool of heads and thoraces were used. The ELISA  
142 lysates were boiled for 10 minutes at 100 °C to eliminate heat-labile non *Plasmodium*  
143 protozoan antigens that will render false positivity [38]. A sub-sample of the  
144 mosquitoes collected from March 2020 to December 2020 were subjected to  
145 dissection to assess parity status as described by Kaindoa *et al* [6]. Recent studies  
146 in the area had determined that indoor collections of *An. gambiae* s.l. consisted only  
147 of *An. arabiensis* (100%), and those of *An. funestus* group were mainly *An. funestus*  
148 s.s [6,28].

## 149 **2.3. Statistical analysis**

150 R statistical software version 3.6.0 [39] was used to execute a simple generalized  
151 linear model (GLM) with binomial distributions to examine odds of sporozoite-  
152 infected *Anopheles* and also parous mosquitoes. Generalized linear mixed models  
153 (GLMM) were used to model the abundance of different mosquito species. Here the  
154 number of mosquitoes caught were modelled as a response variable using a  
155 negative binomial variate to account for the over-dispersion in the number of  
156 catches. Sampling location and season were included as the fixed terms. To account  
157 for the unexplained variation between sampling days, sampling dates nested within  
158 a month of the collection was included as random term. Relative risk and their  
159 corresponding 95% CI were reported. Entomological inoculation rate (EIR) was  
160 estimated as a function of a biting rate and a proportion of mosquitoes tested  
161 positive with *Plasmodium* sporozoite. The annual EIR is estimated by multiplying a  
162 daily EIR with 365 (Annual EIR = daily biting rate  $\times$  sporozoite rate  $\times$  365). The  
163 adjusted annual EIR was estimated by the same function except that, the corrected  
164 biting rate was used in the place of daily biting rate as described by Kaindoa *et al* [6].  
165 Herein, the dry season comprises of months from January to May, and from June to  
166 December for the rainy season.

167

## 168 **3. Results**

169 A total of 306,589 mosquitoes were collected with 53.8% (n = 165,058) being *An.*  
170 *funestus* mosquitoes. A sub-sample of the collected mosquitoes (n = 10,241) were  
171 analyzed for *Plasmodium* sporozoite infections, of which 23.3% (n = 2,382) were *An.*  
172 *arabiensis* and 76.7% (n = 7859), *An. funestus*. Of 7,859 *An. funestus* tested, 4.6%  
173 (n = 365) were positive for *Plasmodium* sporozoites in the salivary glands. On the

174 contrary, only 0.4% (n = 9) of the 2,382 *An. arabiensis* tested were positive. Though  
175 the sporozoite prevalence in Sululu appeared slightly higher than in Igumbiro village  
176 (Table 1), this analysis showed no statistically significant difference in the sporozoite  
177 prevalence for *An. funestus* between villages or seasons ( $p > 0.05$ ). The *An.*  
178 *arabiensis* mosquitoes however had higher sporozoite prevalence in Sululu than in  
179 Igumbiro village (Table 1).

180

181 The parity dissections determined that 50.3% of the *An. funestus* (n/N = 80/159) and  
182 41.8% of the *An. arabiensis females* (n/N = 66/158) were parous (Table 2). There  
183 was no statistical difference in parity between villages for either species (Table 2).  
184 Proportion of *An. funestus* positive for *Pf* sporozoite was high in both seasons (Table  
185 1), and both villages recorded high densities of both vector species throughout the  
186 year (Table 3). Analysis of the year-to-year data showed that in 2020, 97.7% of all  
187 malaria transmission events were mediated by *An. funestus*, and that *An. arabiensis*  
188 played only a minor role (Table 4).



189 **Table 1:** Results of the multivariate analysis of *Plasmodium falciparum* sporozoites infectivity in *Anopheles funestus* and *Anopheles*  
 190 *arabiensis* mosquitoes by village and season

| Species                   | Variable |          | Total (N) | Sporozoite prevalence n (%) | OR (95% LC-UC)   | p-value |
|---------------------------|----------|----------|-----------|-----------------------------|------------------|---------|
| <i>Anopheles funestus</i> | Season   | Dry      | 4425      | 199 (4.5)                   | 1                | 0.54    |
|                           |          | Rainy    | 3434      | 166 (4.8)                   | 1.07 (0.86-1.32) |         |
|                           | Village  | Igumbiro | 3914      | 175 (4.5)                   | 1                | 0.56    |
|                           |          | Sululu   | 3945      | 190 (4.8)                   | 1.07 (0.86-1.32) |         |

|                             |         |          |      |         |   |                   |      |
|-----------------------------|---------|----------|------|---------|---|-------------------|------|
| <i>Anopheles arabiensis</i> | Season  | Dry      | 2172 | 8 (0.4) | 1 | 0.93 (0.11-7.70)  | 0.95 |
|                             |         | Rainy    | 210  | 1 (0.5) |   |                   |      |
|                             | Village | Igumbiro | 1851 | 4 (0.2) | 1 | 4.41 (1.17-16.69) | 0.03 |
|                             |         | Sululu   | 531  | 5 (0.9) |   |                   |      |

\*Percentage sporozoite-prevalence = Sporozoite positive (n)/Total number of mosquitoes analysed (N)

193 **Table 2:** Results of the multivariate analysis of parity in *Anopheles funestus* and *Anopheles arabiensis* mosquitoes by village  
 194

| Species                     | Village  | Total (N) | Parous n (%) | OR (95% LC-UC)   | p-value |
|-----------------------------|----------|-----------|--------------|------------------|---------|
| <i>Anopheles funestus</i>   | Igumbiro | 79        | 39 (49.4)    | 1                | 0.81    |
|                             | Sululu   | 80        | 41 (51.3)    | 1.08 (0.58-2.01) |         |
| <i>Anopheles arabiensis</i> | Igumbiro | 78        | 35 (44.9)    | 1                | 0.44    |
|                             | Sululu   | 80        | 31 (38.8)    | 0.78 (0.41-1.46) |         |

\*Percentage parous = parous (n)/Total number of mosquitoes examined (N)

195  
 196 **Table 3:** Results of the multivariate analysis of biting densities of *Anopheles funestus* and *Anopheles arabiensis* mosquitoes by  
 197 village and season  
 198

| Species                     | Village/Season | Total    | Mean ± 2SE | RR (95% LC-UC) | p-value          |        |
|-----------------------------|----------------|----------|------------|----------------|------------------|--------|
| <i>Anopheles arabiensis</i> | Village        | Igumbiro | 88149      | 18 ± 0.5       | 1                | <0.001 |
|                             |                | Sululu   | 51000      | 6.9 ± 0.3      | 0.26 (0.25-0.28) |        |
|                             | Season         | Dry      | 74819      | 9.5 ± 0.4      | 1                | <0.001 |
|                             |                | Rainy    | 64330      | 14.4 ± 0.5     | 2.54 (1.74-3.72) |        |
| <i>Anopheles funestus</i>   | Village        | Igumbiro | 55617      | 11.4 ± 0.3     | 1                | 0.492  |
|                             |                | Sululu   | 101582     | 13.7 ± 0.5     | 1.02 (0.97-1.07) |        |
|                             | Season         | Dry      | 83475      | 10.6 ± 0.3     | 1                | 0.374  |
|                             |                | Rainy    | 73724      | 16.5 ± 0.6     | 1.26 (0.76-2.07) |        |

199  
200

**Table 4:** Infectious status of *Anopheles funestus* and *Anopheles arabiensis* mosquitoes collected from 2018 to 2020

|                                                                                                           | <i>Anopheles funestus</i> |               |               | <i>Anopheles arabiensis</i> |
|-----------------------------------------------------------------------------------------------------------|---------------------------|---------------|---------------|-----------------------------|
|                                                                                                           | 2018                      | 2019          | 2020          | 2020                        |
| Total number of mosquitoes collected by CDC light trap                                                    | 73237                     | 72661         | 9795          | 12772                       |
| Total number of trap nights                                                                               | 6206                      | 4287          | 476           | 476                         |
| Biting rate per night                                                                                     | 11.8                      | 16.95         | 20.58         | 3.08                        |
| Relative efficiency (CDC-LT) relative to HLC (derived from Okumu <i>et al</i> [40])                       | 0.68                      | 0.68          | 0.68          | 0.3                         |
| Corrected biting rate                                                                                     | 17.35                     | 24.93         | 30.26         | 10.27                       |
| Total number of mosquitoes analysed for <i>Plasmodium falciparum</i> circumsporozoite protein (CSP) - (S) | 3641                      | 1604          | 1228          | 1466                        |
| Total number of sporozoite positive mosquitoes (s)                                                        | 178                       | 64            | 77            | 6                           |
| Sporozoite prevalence (s/S)                                                                               | 0.05                      | 0.04          | 0.06          | 0.0041                      |
| <b>Annual EIR (adjusted)</b>                                                                              | <b>316.63</b>             | <b>363.98</b> | <b>662.69</b> | <b>15.37</b>                |
| <b>% EIR contribution for the year 2020 (adjusted)</b>                                                    |                           |               |               | <b>97.7%</b>                |
|                                                                                                           |                           |               |               | <b>2.3%</b>                 |

\*Annual EIR (adjusted) = Corrected biting rate × Sporozoite rate × 365

\*The data presented here excluded samples collected by Prokopack aspirators

201 **Table 5: Plasmodium sporozoite infectivity by village, mosquito species and month.**

202  
203

| Month                   | Sutulu              |                       | Igumbiro            |                       |
|-------------------------|---------------------|-----------------------|---------------------|-----------------------|
|                         | <i>An. funestus</i> | <i>An. arabiensis</i> | <i>An. funestus</i> | <i>An. arabiensis</i> |
| Jan-18 % <sub>(N)</sub> | -                   | -                     | 0% (1)              | -                     |
| Feb-18 % <sub>(N)</sub> | -                   | -                     | 0% (15)             | -                     |
| Mar-18 % <sub>(N)</sub> | 15.1% (126)         | -                     | 6.7% (150)          | -                     |
| Apr-18 % <sub>(N)</sub> | 11.1% (144)         | -                     | 5.7% (159)          | -                     |
| May-18 % <sub>(N)</sub> | 3.5% (666)          | -                     | 1.6% (569)          | -                     |
| Jun-18 % <sub>(N)</sub> | 5.8% (365)          | -                     | 5.2% (250)          | -                     |
| Jul-18 % <sub>(N)</sub> | 1.6% (131)          | -                     | 0% (16)             | -                     |
| Aug-18 % <sub>(N)</sub> | 5.4% (184)          | -                     | 4.2% (120)          | -                     |
| Sep-18 % <sub>(N)</sub> | 7% (172)            | -                     | 4.2% (262)          | -                     |
| Oct-18 % <sub>(N)</sub> | 22.2% (9)           | -                     | 13% (23)            | -                     |
| Nov-18 % <sub>(N)</sub> | 0% (40)             | -                     | 3.7% (82)           | -                     |
| Dec-18 % <sub>(N)</sub> | 5.7% (88)           | -                     | 6.8% (44)           | -                     |
| Jan-19 % <sub>(N)</sub> | 6% (332)            | -                     | 0% (22)             | -                     |
| Feb-19 % <sub>(N)</sub> | 2.3% (129)          | -                     | 7.1% (85)           | -                     |
| Mar-19 % <sub>(N)</sub> | 3.9% (127)          | -                     | 6.7% (15)           | -                     |
| Apr-19 % <sub>(N)</sub> | 4% (125)            | -                     | 33.3% (6)           | -                     |
| May-19 % <sub>(N)</sub> | 2.6% (389)          | -                     | 4.7% (106)          | -                     |
| Jun-19 % <sub>(N)</sub> | 2.2% (46)           | -                     | 10% (10)            | -                     |
| Jul-19 % <sub>(N)</sub> | 0% (2)              | -                     | -                   | -                     |
| Aug-19 % <sub>(N)</sub> | 0% (1)              | -                     | 0% (50)             | -                     |
| Sep-19 % <sub>(N)</sub> | 0% (3)              | -                     | 0% (19)             | -                     |
| Oct-19 % <sub>(N)</sub> | 4.9% (61)           | -                     | 0% (23)             | -                     |
| Nov-19 % <sub>(N)</sub> | 7.7% (26)           | -                     | -                   | -                     |
| Dec-19 % <sub>(N)</sub> | 4.8% (42)           | -                     | 0% (10)             | -                     |
| Jan-20 % <sub>(N)</sub> | -                   | -                     | 0% (1)              | -                     |
| Mar-20 % <sub>(N)</sub> | 8% (50)             | 0% (83)               | 8.8% (217)          | 0.8% (127)            |
| Jun-20 % <sub>(N)</sub> | 8.8% (170)          | 0% (11)               | 8.2% (403)          | 0.5% (397)            |
| Jul-20 % <sub>(N)</sub> | 0% (126)            | 0% (107)              | 4.5% (313)          | 0% (315)              |
| Aug-20 % <sub>(N)</sub> | 6.6% (76)           | 1.7% (59)             | 0% (140)            | 0% (280)              |
| Sep-20 % <sub>(N)</sub> | 0% (204)            | 0.9% (106)            | 0% (413)            | 0% (281)              |
| Oct-20 % <sub>(N)</sub> | 5.9% (65)           | 4.2% (72)             | 5.9% (153)          | 0% (276)              |
| Nov-20 % <sub>(N)</sub> | 0% (25)             | 0% (88)               | 8% (237)            | 0.6% (174)            |

204 **4. Discussion**

205 Recent evidence has shown that *An. funestus* now mediates most of the ongoing  
206 malaria transmission in many countries in East and Southern Africa [6,41,42]. In rural  
207 south-eastern Tanzania, this species carries more than 85% of all malaria infections  
208 even in villages where it occurs at lower frequencies than *An. arabiensis* [6,21,43].  
209 malaria transmission has declined significantly in the Kilombero valley since 2000,  
210 mostly due to the wide coverage of ITNs and effective case management [20,22].

211

212 This short report presents an analysis of mosquitoes collected between 2018 and  
213 2020 in two villages previously identified as having very high densities of *An.*  
214 *funestus*. It had been hypothesized that the proven dominance of *An. funestus* in the  
215 valley, coupled with the high densities of this vector species, as well as its strong  
216 pyrethroid-resistance status and greater survival in nature may lead to high residual  
217 transmission burden in the relevant villages, and that this situation may make  
218 malaria transmission control much more difficult than elsewhere. This analysis  
219 confirms the high parity rates but further presents two surprising findings. First is the  
220 extremely high *Plasmodium* infection prevalence in the *An. funestus* mosquitoes  
221 over the three years of sampling, averaging 4.6% despite high ITN use in the areas.  
222 Given the nightly mosquito catches by CDC light traps, this translates to 447.8  
223 infectious bites/person/year, which is considerably higher than most recent estimates  
224 [6,21]. The second finding was that the high infection prevalence rates were  
225 consistent throughout dry and rainy season for the entire duration of the study. This  
226 suggests that *An. funestus* not only plays an important role in transmission but also  
227 that it mediates transmission throughout the whole year. There were months with  
228 very high transmission and months with very low transmission, but when data was

229 aggregated by season, there was no significant difference in transmission intensities.  
230 Additional studies will be necessary to understand the dry season ecology of *An.*  
231 *funestus* and the factors driving transmission at different times of the year, so as to  
232 design effective tools towards reducing malaria transmission. Additionally, the higher  
233 sporozoite prevalence observed in *An. arabiensis* in one of the village (i.e. Sululu)  
234 corroborate recent finding (Swai *et al.*, unpublished) that indicate geographical  
235 heterogeneity in transmission over small distances. Thus, understanding local  
236 vectors' ecology is crucial for control measures. Polymerase chain reaction (PCR)  
237 may have greater sensitivity in detection of *Plasmodium* sporozoite, however, these  
238 improvements are marginal and practically irrelevant in areas with moderate to high  
239 transmission such as south-eastern Tanzanian districts of Ulanga and Kilombero.  
240  
241 Kaindoa *et al.* [6] reported *An. funestus* mosquitoes carrying 86% of malaria  
242 infections in Kilombero valley. Lwetoijera *et al.* also demonstrated significant role of  
243 *An. funestus* following the decline of *An. gambiae*, formerly the most important vector  
244 in the valley [23]. Since then, several other studies have confirmed the dominance of  
245 *An. funestus* in this area [20]. In addition, reports of higher entomological inoculation  
246 rates by *An. funestus* have also been documented elsewhere [44–46], however, the  
247 rates were not as high. Other studies have also shown the strong pyrethroid  
248 resistance, and that while its aquatic ecology is still poorly understood, it occupies  
249 perennial habitats which remain water-filled most of the year [30]. This ecological  
250 characteristic may explain its dominance in densities and transmission activity  
251 throughout the year. It is clear therefore that efforts to further reduce malaria  
252 transmission by this vector must consider specific measures targeting *An. funestus*  
253 so as to strongly diminish its potential.

254 Opportunities for improved control of *An. funestus* in the area may include new  
255 generation ITNs with synergists or multiple actives [47–50], or use of larval source  
256 management, which would be effective even against the pyrethroid-resistant  
257 populations. Fortunately, the current National Malaria Strategic Plan (NMSP) of  
258 Tanzania encourage implementation of larviciding in rural settings [51]. Coupled with  
259 recent findings of Nambunga *et al.* [30] which indicate that aquatic habitats of *An.*  
260 *funestus* mosquitoes in Kilombero valley falls within few, fixed and findable criterion  
261 of World Health Organization [52]. Thus, provide possibilities of a cost-effective and  
262 plausible species-specific intervention to significantly reduce malaria transmission in  
263 this valley. Additionally, susceptibility of *An. funestus* towards organophosphate  
264 notably pirimiphos methyl poses a potential opportunity for control. Pirimiphos methyl  
265 is already approved and used for IRS in Tanzania [53,54], thus there is a need to  
266 design cost-effective tools that may exploit the possibility of using pirimiphos methyl.  
267

## 268 **5. Conclusion**

269 This study demonstrates that despite the widespread use and overall impact of ITNs,  
270 there is still persistently high *Plasmodium* infection prevalence in the dominant  
271 malaria vector, *An. funestus*, causing intense year-round malaria transmission in the  
272 study villages. Further reduction in malaria burden in this and similar settings thus  
273 requires effective targeting of *An. funestus*. The study also demonstrates that in  
274 certain contexts such as these, where one species is mediating most of the  
275 pathogen transmission, there could be significant potential in pursuing a species-  
276 specific approach for vector control by investigating and targeting the dominant  
277 vector species to suppress transmission.

278



279 **Abbreviations**

280 CDC: Centers for Diseases Control and Prevention; LLINs: Long-Lasting Insecticidal  
281 Nets; NMSP: National Malaria Strategic Plan; ITN: Insecticide-Treated Net; IRS:  
282 Indoor Residual Spraying; ELISA: Enzyme-Linked Immunosorbent Assay; GLM:  
283 Generalized Linear Model; GLMM: Generalized Linear Mixed Model; *Pf*-CSP:  
284 *Plasmodium falciparum* Circumsporozoite Protein; PCR: Polymerase Chain Reaction

285

286 **Declarations**

287 **Ethical approval and consent to participate**

288 Ethical approvals for this project were obtained from Ifakara Health Institute's  
289 Institutional Review Board (Ref. IHI/IRB/No: 007 - 2018) and the Medical Research  
290 Coordinating Committee (MRCC) at the National Institute for Medical Research, in  
291 Tanzania (Ref: NIMR/HQ/R.8a/Vol. IX/2895). Written consents were sought from all  
292 participants of this study, after they had understood the purpose and procedure of  
293 the discussions.

294

295 **Consent for publication**

296 Permission to publish this study was obtained from National institute for Medical  
297 Research, in Tanzania (NIMR/HQ/P.12 VOL XXXII/144).

298

299 **Data availability**

300 Data used to generate our findings can be accessed upon reasonable request to the  
301 corresponding author.

302

303 **Competing interest**

304 Authors declare no conflict of interest.

305

306 **Funding statement**

307 This work was supported by the Wellcome Trust International Masters Fellowship in  
308 Tropical Medicine & Hygiene (Grant No. 212633/Z/18/Z) awarded to SAM. This work  
309 was also supported by Bill and Melinda Gates Foundation (Grant Number:  
310 OPP1177156) and Howard Hughes Medical institute (Grant number: OPP1099295)  
311 both awarded to FOO.

312

313 **Authors contributions**

314 SAM, FOO, HSN and EEH were involved in study design. SAM, EEH, HSN, JK, HB,  
315 KK and MK were involved in data collection. SAM and HSN conducted data analysis.  
316 SAM wrote the manuscript. FOO, HSN, EWK and EEH provided thorough review of  
317 the manuscript. All authors read and approved the final manuscript.

318

319 **Acknowledgments**

320 We would like to thank village leaders and community members in Igumbiro and  
321 Sululu Villages for allowing their houses and areas to be used during mosquito  
322 collection. We also extend our gratitude to Joseph Mgando, Neema Nombo, Dickson  
323 Mwasheshi and Godfrey Matanila for their assistance during mosquito samples'  
324 processing. We are also grateful to Najat Kahamba, Doreen Siria, Rukiyah  
325 Njalambaha, Augusto Mwambaluka, Jonael Msangi, Said Abbasi, Swaleh Masoud  
326 and Francis Tumbo for their valuable assistance in making this work feasible.

327

328 **Reference**

- 329 1. World Health Organization. WHO expert committee on malaria [Internet].  
330 World Health Organization - Technical Report Series. 2000. Available:  
331 <https://apps.who.int/iris/handle/10665/42247>
- 332 2. World Health Organization. World Malaria Report 2019. Geneva. [Internet].  
333 2019. Available: [https://www.who.int/publications-detail/world-malaria-report-](https://www.who.int/publications-detail/world-malaria-report-2019)  
334 2019
- 335 3. Bhatt S, Weiss DJ, Cameron E, Bisanzio D, Mappin B, Dalrymple U, et al. The  
336 effect of malaria control on *Plasmodium falciparum* in Africa between 2000 and  
337 2015. *Nature*. 2015; doi:10.1038/nature15535
- 338 4. Steketee, Richard W. and CCC. Impact of national malaria control scale-up  
339 programmes in Africa: magnitude and attribution of effects. *Malar J*. 2010;299.
- 340 5. Matowo NS, Munhenga G, Tanner M, Coetzee M, Feringa WF, Ngowo HS, et  
341 al. Fine-scale spatial and temporal heterogeneities in insecticide resistance  
342 profiles of the malaria vector, *Anopheles arabiensis* in rural south-eastern  
343 Tanzania [version 1; referees: 2 approved]. *Wellcome Open Res*. 2017;  
344 doi:10.12688/wellcomeopenres.12617.1
- 345 6. Kaindoa EW, Matowo NS, Ngowo HS, Mkandawile G, Mmbando A, Finda M,  
346 et al. Interventions that effectively target *Anopheles funestus* mosquitoes could  
347 significantly improve control of persistent malaria transmission in south-eastern  
348 Tanzania. *PLoS One*. 2017;12. doi:10.1371/journal.pone.0177807
- 349 7. Casimiro S, Coleman M, Mohloai P, Hemingway J, Sharp B. Insecticide  
350 resistance in *Anopheles funestus* (Diptera: Culicidae) from Mozambique. *J*  
351 *Med Entomol*. 2006; doi:10.1603/0022-2585(2006)043[0267:IRIAFD]2.0.CO;2
- 352 8. Cuamba N, Morgan JC, Irving H, Steven A, Wondji CS. High level of pyrethroid  
353 resistance in an *Anopheles funestus* population of the chokwe district in

- 354 mozambique. PLoS One. 2010;5. doi:10.1371/journal.pone.0011010
- 355 9. Russell TL, Govella NJ, Azizi S, Drakeley CJ, Kachur SP, Killeen GF.  
356 Increased proportions of outdoor feeding among residual malaria vector  
357 populations following increased use of insecticide-treated nets in rural  
358 Tanzania. Malar J. 2011;10. doi:10.1186/1475-2875-10-80
- 359 10. Sougoufara S, Diédhiou SM, Doucouré S, Diagne N, Sembène PM, Harry M,  
360 et al. Biting by *Anopheles funestus* in broad daylight after use of long-lasting  
361 insecticidal nets: A new challenge to malaria elimination. Malar J. 2014;  
362 doi:10.1186/1475-2875-13-125
- 363 11. Moiroux N, Gomez MB, Pannetier C, Elanga E, Djènontin A, Chandre F, et al.  
364 Changes in *anopheles funestus* biting behavior following universal coverage of  
365 long-lasting insecticidal nets in benin. J Infect Dis. 2012;  
366 doi:10.1093/infdis/jjs565
- 367 12. Ashley EA, Dhorda M, Fairhurst RM, Amaratunga C, Lim P, Suon S, et al.  
368 Spread of artemisinin resistance in *Plasmodium falciparum* malaria. N Engl J  
369 Med. 2014; doi:10.1056/NEJMoa1314981
- 370 13. Dondorp AM, Yeung S, White L, Nguon C, Day NPJ, Socheat D, et al.  
371 Artemisinin resistance: Current status and scenarios for containment. Nature  
372 Reviews Microbiology. 2010. doi:10.1038/nrmicro2331
- 373 14. Matowo NS, Moore J, Mapua S, Madumla EP, Moshi IR, Kaindoa EW, et al.  
374 Using a new odour-baited device to explore options for luring and killing  
375 outdoor-biting malaria vectors: A report on design and field evaluation of the  
376 Mosquito Landing Box. Parasites and Vectors. 2013;6. doi:10.1186/1756-  
377 3305-6-137
- 378 15. Finda MF, Moshi IR, Monroe A, Limwagu AJ, Nyoni AP, Swai JK, et al. Linking

- 379 human behaviours and malaria vector biting risk in south-eastern Tanzania.  
380 PLoS One. 2019; doi:10.1371/journal.pone.0217414
- 381 16. Monroe A, Monroe A, Monroe A, Moore S, Moore S, Moore S, et al. Methods  
382 and indicators for measuring patterns of human exposure to malaria vectors.  
383 Malar J. 2020; doi:10.1186/s12936-020-03271-z
- 384 17. Andolina C, Rek JC, Briggs J, Okoth J, Musiime A, Ramjith J, et al. Sources of  
385 persistent malaria transmission in a setting with effective malaria control in  
386 eastern Uganda: a longitudinal, observational cohort study. 2021;3099.
- 387 18. Kaindoa EW, Finda M, Kiplagat J, Mkandawile G, Nyoni A, Coetzee M, et al.  
388 Housing gaps, mosquitoes and public viewpoints: A mixed methods  
389 assessment of relationships between house characteristics, malaria vector  
390 biting risk and community perspectives in rural Tanzania. Malar J. 2018;  
391 doi:10.1186/s12936-018-2450-y
- 392 19. Liu JX, Bousema T, Zelman B, Gesase S, Hashim R, Maxwell C, et al. Is  
393 housing quality associated with malaria incidence among young children and  
394 mosquito vector numbers? Evidence from Korogwe, Tanzania. PLoS One.  
395 2014;9. doi:10.1371/journal.pone.0087358
- 396 20. Okumu F, Finda M. Key Characteristics of Residual Malaria Transmission in  
397 Two Districts in South-Eastern Tanzania—Implications for Improved Control. J  
398 Infect Dis. 2021;223: 15–17. doi:10.1093/infdis/jiaa653
- 399 21. Finda MF, Limwagu AJ, Ngowo HS, Matowo NS, Swai JK, Kaindoa E, et al.  
400 Dramatic decreases of malaria transmission intensities in Ifakara, south-  
401 eastern Tanzania since early 2000s. Malar J. 2018; doi:10.1186/s12936-018-  
402 2511-2
- 403 22. Russell TL, Lwetoijera DW, Maliti D, Chipwaza B, Kihonda J, Charlwood JD, et

- 404 al. Impact of promoting longer-lasting insecticide treatment of bed nets upon  
405 malaria transmission in a rural Tanzanian setting with pre-existing high  
406 coverage of untreated nets. *Malar J.* 2010;9. doi:10.1186/1475-2875-9-187
- 407 23. Lwetoijera DW, Harris C, Kiware SS, Dongus S, Devine GJ, McCall PJ, et al.  
408 Increasing role of *Anopheles funestus* and *Anopheles arabiensis* in malaria  
409 transmission in the Kilombero Valley, Tanzania. *Malar J.* 2014;13.  
410 doi:10.1186/1475-2875-13-331
- 411 24. Pinda PG, Eichenberger C, Ngowo HS, Msaky DS, Abbasi S, Kihonda J, et al.  
412 Comparative assessment of insecticide resistance phenotypes in two major  
413 malaria vectors, *Anopheles funestus* and *Anopheles arabiensis* in south-  
414 eastern Tanzania. *Malar J.* 2020; doi:10.1186/s12936-020-03483-3
- 415 25. Ngowo HS, Hape EE, Matthiopoulos J, Ferguson HM, Okumu FO. Fitness  
416 characteristics of the malaria vector *Anopheles funestus* during an attempted  
417 laboratory colonization. *Malar J.* 2021;20. doi:10.1186/s12936-021-03677-3
- 418 26. Takken W, Verhulst NO. Host preferences of blood-feeding mosquitoes.  
419 *Annual Review of Entomology.* 2013. doi:10.1146/annurev-ento-120811-  
420 153618
- 421 27. Charlwood JD, Vij R, Billingsley PF. Dry season refugia of malaria-transmitting  
422 mosquitoes in a dry savannah zone of east Africa. *Am J Trop Med Hyg.*  
423 2000;62. doi:10.4269/ajtmh.2000.62.726
- 424 28. Ngowo, H. S., Kaindoa, E. W., Matthiopoulos, J., Ferguson, H. M., & Okumu  
425 FO. Variations in household microclimate affect outdoor-biting behaviour of  
426 malaria vectors. *Wellcome open Res.* 2017;2.
- 427 29. Limwagu AJ, Kaindoa EW, Ngowo HS, Hape E, Finda M, Mkandawile G, et al.  
428 Using a miniaturized double-net trap (DN-Mini) to assess relationships

- 429 between indoor-outdoor biting preferences and physiological ages of two  
430 malaria vectors, *Anopheles arabiensis* and *Anopheles funestus*. *Malar J.* 2019;  
431 doi:10.1186/s12936-019-2913-9
- 432 30. Nambunga IH, Ngowo HS, Mapua SA, Hape EE, Msugupakulya BJ, Msaky  
433 DS, et al. Aquatic habitats of the malaria vector *Anopheles funestus* in rural  
434 south-eastern Tanzania. *Malar J.* 2020; doi:10.1186/s12936-020-03295-5
- 435 31. Kaindoa EW, Ngowo HS, Limwagu AJ, Tchouakui M, Hape E, Abbasi S, et al.  
436 Swarms of the malaria vector *Anopheles funestus* in Tanzania. *Malar J.* 2019;  
437 doi:10.1186/s12936-019-2660-y
- 438 32. Swai JK, Finda MF, Madumla EP, Lingamba GF, Moshi IR, Rafiq MY, et al.  
439 Studies on mosquito biting risk among migratory rice farmers in rural south-  
440 eastern Tanzania and development of a portable mosquito-proof hut. *Malar J.*  
441 2016; doi:10.1186/s12936-016-1616-8
- 442 33. National Bureau of Statistics. 2012 population and housing census, population  
443 distribution by administrative areas. 2013.
- 444 34. Mboera LEG, Kihonda J, Braks MAH, Knols BGJ. Short report: Influence of  
445 centers for disease control light trap position, relative to a human-baited bed  
446 net, on catches of *Anopheles gambiae* and *Culex quinquefasciatus* in  
447 Tanzania. *Am J Trop Med Hyg.* 1998;59: 595–596.  
448 doi:10.4269/ajtmh.1998.59.595
- 449 35. Maia MF, Robinson A, John A, Mgando J, Simfukwe E, Moore SJ. Comparison  
450 of the CDC Backpack aspirator and the Prokopack aspirator for sampling  
451 indoor- and outdoor-resting mosquitoes in southern Tanzania. *Parasites and*  
452 *Vectors.* 2011;4. doi:10.1186/1756-3305-4-124
- 453 36. Gillies MT, De Meillon B. The Anophelinae of Africa south of the Sahara

- 454 (Ethiopian zoogeographical region). Sahara Ethiop Zoogeographical. 1968;
- 455 37. Beier JC, Perkins P V., Koros JK, Onyango FK, Gargan TP, Wirtz RA, et al.  
456 Malaria sporozoite detection by dissection and ELISA to assess infectivity of  
457 afrotropical Anopheles (Diptera: Culicidae). J Med Entomol. 1990;  
458 doi:10.1093/jmedent/27.3.377
- 459 38. Durnez L, Van Bortel W, Denis L, Roelants P, Veracx A, Trung HD, et al. False  
460 positive circumsporozoite protein ELISA: A challenge for the estimation of the  
461 entomological inoculation rate of malaria and for vector incrimination. Malar J.  
462 2011; doi:10.1186/1475-2875-10-195
- 463 39. R Development Core Team R. R: A Language and Environment for Statistical  
464 Computing [Internet]. R Foundation for Statistical Computing. 2019. p. 409.  
465 doi:10.1007/978-3-540-74686-7
- 466 40. Okumu FO, Kotas ME, Kihonda J, Mathenge E, Killeen GF, Moore SJ.  
467 Comparative Evaluation of Methods Used for Sampling Malaria Vectors in the  
468 Kilombero Valley, South Eastern Tanzania. Open Trop Med J. 2008;  
469 doi:10.2174/1874315300801010051
- 470 41. Burke A, Dahan-Moss Y, Duncan F, Qwabe B, Coetzee M, Koekemoer L, et al.  
471 Anopheles parensis contributes to residual malaria transmission in South  
472 Africa. Malar J. 2019; doi:10.1186/s12936-019-2889-5
- 473 42. McCann RS, Ochomo E, Bayoh MN, Vulule JM, Hamel MJ, Gimnig JE, et al.  
474 Reemergence of Anopheles funestus as a vector of Plasmodium falciparum in  
475 Western Kenya after long-term implementation of insecticide-treated bed nets.  
476 Am J Trop Med Hyg. 2014; doi:10.4269/ajtmh.13-0614
- 477 43. Swai JK, Mmbando AS, Ngowo HS, Odufuwa OG, Finda MF, Mponzi W, et al.  
478 Protecting migratory farmers in rural Tanzania using eave ribbons treated with



- 479 the spatial mosquito repellent, transfluthrin. *Malar J.* 2019;  
480 doi:10.1186/s12936-019-3048-8
- 481 44. Cohuet A, Simard F, Wondji CS, Antonio-nkondjio C, Awono-ambene P,  
482 Fontenille D. High Malaria Transmission Intensity Due to *Anopheles funestus* (  
483 Diptera: Culicidae) in a Village of Savannah – Forest Transition Area in  
484 Cameroon. 2004; 901–905.
- 485 45. Trape JF, Tall A, Sokhna C, Ly AB, Diagne N, Ndiath O, et al. The rise and fall  
486 of malaria in a west African rural community, Dielmo, Senegal, from 1990 to  
487 2012: A 22 year longitudinal study. *Lancet Infect Dis.* 2014;14.  
488 doi:10.1016/S1473-3099(14)70712-1
- 489 46. Antonio-Nkondjio C, Awono-Ambene P, Toto JC, Meunier JY, Zebaze-Kemleu  
490 S, Nyambam R, et al. High malaria transmission intensity in a village close to  
491 Yaounde, the capital city of Cameroon. *J Med Entomol.* 2002;39.  
492 doi:10.1603/0022-2585-39.2.350
- 493 47. Gleave K, Lissenden N, Richardson M, Choi L, Ranson H. Piperonyl butoxide  
494 (PBO) combined with pyrethroids in insecticide-treated nets to prevent malaria  
495 in Africa. *Cochrane Database of Systematic Reviews.* 2018.  
496 doi:10.1002/14651858.CD012776.pub2
- 497 48. Protopopoff N, Mosha JF, Lukole E, Charlwood JD, Wright A, Mwalimu CD, et  
498 al. Effectiveness of a long-lasting piperonyl butoxide-treated insecticidal net  
499 and indoor residual spray interventions, separately and together, against  
500 malaria transmitted by pyrethroid-resistant mosquitoes: a cluster, randomised  
501 controlled, two-by-two factorial design trial. *Lancet.* 2018;391.  
502 doi:10.1016/S0140-6736(18)30427-6
- 503 49. Pennetier C, Bouraima A, Chandre F, Piameu M, Etang J, Rossignol M, et al.

- 504 Efficacy of Olyset® Plus, a New Long-Lasting Insecticidal Net Incorporating  
505 Permethrin and Piperonyl-Butoxide against Multi-Resistant Malaria Vectors.  
506 PLoS One. 2013;8. doi:10.1371/journal.pone.0075134
- 507 50. Corbel V, Chabi J, Dabiré RK, Etang J, Nwane P, Pigeon O, et al. Field  
508 efficacy of a new mosaic long-lasting mosquito net (PermaNet® 3.0) against  
509 pyrethroid-resistant malaria vectors: A multi centre study in Western and  
510 Central Africa. Malar J. 2010;9. doi:10.1186/1475-2875-9-113
- 511 51. Ministry of Health and Social Welfare. Tanzania national Malaria Strategic Plan  
512 2014-2020 [Internet]. Available: [https://www.out.ac.tz/wp-](https://www.out.ac.tz/wp-content/uploads/2019/10/Malaria-Strategic-Plan-2015-2020-1.pdf)  
513 [content/uploads/2019/10/Malaria-Strategic-Plan-2015-2020-1.pdf](https://www.out.ac.tz/wp-content/uploads/2019/10/Malaria-Strategic-Plan-2015-2020-1.pdf)
- 514 52. World Health Organization. Larval source management: a supplementary  
515 malaria vector control measure [Internet]. 2013. Available:  
516 <https://apps.who.int/iris/handle/10665/85379>
- 517 53. Mashauri FM, Manjurano A, Kinung'hi S, Martine J, Lyimo E, Kishamawe C, et  
518 al. Indoor residual spraying with microencapsulated pirimiphos-methyl  
519 (Actellic® 300CS) against malaria vectors in the Lake Victoria basin, Tanzania.  
520 PLoS One. 2017; doi:10.1371/journal.pone.0176982
- 521 54. Haji KA, Thawer NG, Khatib BO, Mcha JH, Rashid A, Ali AS, et al. Efficacy,  
522 persistence and vector susceptibility to pirimiphos-methyl (Actellic®;  
523 300CS) insecticide for indoor residual spraying in Zanzibar. Parasites and  
524 Vectors. 2015;8. doi:10.1186/s13071-015-1239-x
- 525
